# Two-antibody pan-ebolavirus cocktail confers broad therapeutic protection in ferrets and nonhuman primates

Zachary A. Bornholdt\*, Andrew S. Herbert\*, Chad E. Mire\*, Shihua He\*, Robert W. Cross, Anna Wec, Dafna M. Abelson, Joan B. Geisbert, Rebekah M. James, Md Niaz Rahim, Wenjun Zhu, Viktoriya Borisevich, Logan Banadyga, Bronwyn M. Gunn, Krystle N. Agans, Eileen Goodwin, Kevin Tierney, William S. Shestowsky, Ognian Bohorov, Natasha Bohorova, Jesus Velasco, Eric Ailor, Do Kim, Michael H. Pauly, Kevin J. Whaley, Galit Alter, Laura M. Walker, Kartik Chandran, Larry Zeitlin<sup>§</sup>, Xiangguo Qiu<sup>§</sup>, Thomas W. Geisbert<sup>§</sup> and John M. Dye<sup>§</sup>

\*Co-first authors

§Corresponding authors.

## Main text

All available experimental vaccines and immunotherapeutics<sup>1,2</sup> against Ebola virus (EBOV), including rVSV-ZEBOV<sup>3</sup> and ZMapp<sup>TM4</sup>, lack activity against other ebolaviruses associated with human disease outbreaks. This year, two separate outbreaks of EBOV in the Democratic Republic of Congo underscored the unpredictable nature of ebolavirus reemergence in a region that has historically experienced outbreaks of the divergent ebolaviruses Sudan virus (SUDV) and Bundibugyo virus (BDBV)<sup>5</sup>. Here we show that MBP134<sup>AF</sup>, a pan-ebolavirus therapeutic comprising two broadly neutralizing human antibodies (bNAbs)<sup>6,7</sup> (see companion manuscript, Wec *et al.*) could protect against lethal EBOV, SUDV, and BDBV infection in ferrets and nonhuman primates (NHPs). MBP134<sup>AF</sup> not only not only establishes a viable therapeutic countermeasure to outbreaks caused by antigenically diverse ebolaviruses but also affords unprecedented effectiveness and potency—a single 25-mg/kg dose was fully protective in NHPs. This best-in-

31 **class antibody cocktail is the culmination of an intensive collaboration spanning**  
32 **academia, industry and government in response to the 2013-2016 EBOV**  
33 **epidemic<sup>6,7</sup> and provides a translational research model for the rapid development**  
34 **of immunotherapeutics targeting emerging infectious diseases.**

35  
36 The 2013-2016 EBOV epidemic in Western Africa and the recent EBOV outbreaks  
37 in the Democratic Republic of Congo have established ebolaviruses as pathogens of  
38 global public health relevance. Of the five ebolaviruses known to infect humans, EBOV,  
39 SUDV, and BDBV have caused outbreaks with case-fatality rates up to 90% in the last  
40 decade<sup>5</sup>. Although several therapeutic products are in clinical development for the  
41 treatment of Ebola virus disease (EVD), no medical countermeasures to SUDV or BDBV  
42 have progressed beyond proof-of-concept studies<sup>1,2,4,8,9</sup>. To address this unmet public  
43 health need, we developed a two-antibody cocktail, MBP134<sup>AF</sup>, with demonstrable activity  
44 against all known ebolaviruses (*companion report, Wec et al.*), including the “pre-  
45 emergent” agent Bombali virus recently discovered in molossid bats in Sierra Leone<sup>10</sup>.  
46 MBP134<sup>AF</sup>, comprising the human bNAbs ADI-15878<sup>AF</sup> and ADI-23774<sup>AF</sup>, was selected  
47 after a systematic process including the assessment and/or optimization of multiple mAbs  
48 and their combinations for potency and breadth, Fc effector functions via glycan  
49 engineering, and *in vivo* efficacy in rodent models of EBOV and SUDV infection  
50 (*companion report, Wec et al.*). ADI-15878<sup>AF</sup> and ADI-23774<sup>AF</sup> both target unique, non-  
51 overlapping epitopes on the ebolavirus glycoprotein (GP), neutralize both the extracellular  
52 and endosomally cleaved forms of GP, and lack crossreactivity against the secreted GP  
53 isoform (sGP) that is abundant in the plasma of infected individuals<sup>6,7</sup>. The exceptional  
54 potency of MBP134<sup>AF</sup> against guinea pig-adapted EBOV and SUDV (*companion report,*

55 *Wec et al.*) warranted continued evaluation in the ferret and NHP large-animal models of  
56 ebolavirus challenge to assess its clinical potential.

57 We determined MPB134<sup>AF</sup>'s protective efficacy against the wild-type Makona  
58 variant of EBOV (EBOV/Makona), SUDV variant Gulu (SUDV/Gulu) and BDBV variant  
59 But-811250 (BDBV/But-811250) in the recently established ferret model, which does not  
60 require any viral adaptation and recapitulates key hallmarks of human EVD<sup>11-13</sup>. Ferrets  
61 challenged intranasally with a lethal dose of EBOV/Makona received two 15-mg doses of  
62 MBP134<sup>AF</sup> three days apart, with the treatment initiated on either day 2 (ferrets 1–4) or  
63 day 3 (ferrets 5–8) post infection (p.i.) (**Fig. 1a**). MBP134<sup>AF</sup> fully protected from lethal  
64 challenge in both treatment groups and cleared viremia even in ferrets 5–8, which showed  
65 signs of active infection by reverse transcription polymerase chain reaction (RT-PCR)  
66 prior to treatment (**Fig. 1b, c**). Similarly, administration of two 15-mg doses of MBP134<sup>AF</sup>  
67 on days 3 and 6 (ferrets 1–4) afforded complete protection in ferrets challenged with lethal  
68 doses of SUDV/Gulu (**Fig. 1d**) or BDBV/But-811250 (**Fig. 1g**) and inhibited viral  
69 replication (**Fig. 1e-f, 1g-i**). Because SUDV/Gulu and BDBV/But-811250 have been  
70 shown to be less virulent in ferrets than EBOV/Makona, with a relatively delayed time to  
71 peak viremia<sup>12</sup>, we next evaluated MBP134<sup>AF</sup> in a lower dose-sparing treatment course  
72 of two 5-mg doses given on days 3 and 6 p.i. In this treatment group, ferrets 5–8  
73 challenged with SUDV/Gulu displayed high levels of viremia and uniformly succumbed to  
74 disease by day 11 p.i. (**Fig. 1d-f**). By contrast, ferrets 5–8 challenged with BDBV/But-  
75 811250 (characterized by the slowest onset of viremia<sup>12</sup>) were protected by the two 5-mg  
76 dose regimen, with reversion of viremia in some animals (**Fig. 1g-i**). MBP134<sup>AF</sup> is the first

77 ebolavirus therapeutic to achieve full protection in ferrets against three divergent  
78 ebolaviruses.

79 We next evaluated the MBP134<sup>AF</sup> cocktail's efficacy in the gold-standard non-  
80 human primate (NHP) model of Ebola virus challenge. Ten rhesus macaques were  
81 randomized into two treatment groups, NHPs 1–4 and NHPs 5–8, and a PBS control  
82 group of two animals, and then challenged intramuscularly (i.m.) with 1,000 plaque-  
83 forming units (PFUs) of the Kikwit variant of EBOV (EBOV/Kikwit). NHPs 1–4 received a  
84 single 25-mg/kg dose of MBP134<sup>AF</sup> on day 4 p.i., whereas NHPs 5–8 received a more  
85 conservative two-dose regimen of 50 mg/kg then 25 mg/kg on days 4 and 7 p.i.,  
86 respectively. Remarkably, the single 25-mg/kg dose of MBP134<sup>AF</sup> completely reversed  
87 the onset of EVD and protected NHPs 1–4 from a lethal EBOV/Kikwit exposure (**Fig. 2a**).  
88 All animals in this study were confirmed to have had an active EBOV/Kikwit infection via  
89 RT-PCR ( $10^7$ – $10^{10}$  viral genome equivalents per mL (GEQ/mL)) and plaque assay ( $10^3$ –  
90  $10^6$  PFU/mL) prior to treatment on day 4 p.i. (**Fig. 2b, c**). These high levels of viremia  
91 could nonetheless be reversed by MBP134<sup>AF</sup> treatment—viremia in animals from both  
92 treatment groups fell below the limit of detection in the plaque assay by day 7 p.i. and in  
93 the RT-PCR assay by day 14 p.i. (**Fig. 2b, c**). Fever was detected in control animals and  
94 in three out of four animals in each treatment group at the time of the first MBP134<sup>AF</sup>  
95 dosing; however all treated animals returned to normal body temperature by day 10 p.i.  
96 Treated animals also maintained substantially lower clinical scores and reduced grade of  
97 thrombocytopenia compared to control NHPs (**Fig. 2d-f**). Two animals (NHP-3 and NHP-  
98 8), one from each treatment group, showed significant signs of EVD-induced liver injury  
99 prior to treatment, with elevated C-reactive protein (CRP), alanine aminotransferase

100 (ALT) and aspartate aminotransferase (AST). These and other hallmarks of EVD were  
101 significantly reduced post-treatment with MBP134<sup>AF</sup> by day 10 p.i. (**Fig. 2d-i, Extended**  
102 **Data Fig. 1**). Thus, the pan-ebolavirus MBP134<sup>AF</sup> cocktail could potentially reverse the  
103 course of EVD and deliver complete therapeutic protection in NHPs following a lethal  
104 EBOV/Kikwit challenge with a single dose of only 25 mg/kg.

105 In the experiments described above, MBP134<sup>AF</sup> was produced using a *Nicotiana*  
106 *benthamiana* (tobacco) plant-based expression system<sup>14,15</sup>. However, because the  
107 manufacturing infrastructure for *Nicotiana*-based products is still limited, we sought to  
108 transition MBP134<sup>AF</sup> to the well-established Chinese hamster ovary (CHO) cell production  
109 platform. Accordingly, we expressed MBP134<sup>AF</sup> in a GDP-fucose transporter SLC35C1-  
110 knockout cell line (CHOK1-AF), which maintains the afucosylated state of MBP134<sup>AF,16</sup>.  
111 Comparative studies indicated that CHOK1-AF–produced MBP134<sup>AF</sup> is comparable or  
112 even surpasses its plant-produced counterpart in neutralization potential (data not  
113 shown), Fc effector functions relevant to this cocktail’s antiviral potency (**Extended Data**  
114 **Fig. 2**), and protective efficacy in guinea pigs (**Extended Data Fig. 3**). Therefore, the  
115 *Nicotiana*- and CHO-produced MBP134<sup>AF</sup> products are functionally equivalent.  
116 Accordingly, all remaining experiments described herein were performed with CHOK1-  
117 AF expressed MBP134<sup>AF</sup>, the manufacturing system being employed for its clinical  
118 development.

119 We tested MBP134<sup>AF</sup> in a blinded NHP study in which rhesus macaques were  
120 challenged i.m. with SUDV variant Boniface (SUDV/Boniface; 1,000 PFU). This model  
121 typically affords 50% lethality<sup>17</sup> (unpublished data). Twelve animals were randomized into  
122 two treatment groups, NHPs 1–4 and NHPs 5–8, and one control group, PBS controls 1–

123 4. On day 5 p.i., NHPs 1–4 and 5–8 received single 7.5-mg/kg and 25-mg/kg doses of  
124 MBP134<sup>AF</sup>, respectively. Both doses of MBP134<sup>AF</sup> provided full protection from SUDV  
125 disease and all MBP134<sup>AF</sup>-treated animals became viremia-negative by day 8 p.i. (**Fig.**  
126 **3a-c**). MBP134<sup>AF</sup>-treated animals displayed little to no clinical signs of disease in contrast  
127 to the control animals—half of the latter succumbed to infection (**Fig. 3d**). Importantly, all  
128 of the animals in the blinded MBP134<sup>AF</sup> cohort registered a fever prior to receiving  
129 MBP134<sup>AF</sup> on day 5 p.i. (**Fig. 3e**). The two surviving control animals remained viremic  
130 past day 14 p.i. (**Fig. 3b, c**), maintained elevated ALT, AST, and alkaline phosphatase  
131 (ALP) levels, and showed significant thrombocytopenia (**Fig. 3f-i, Extended Data Fig. 4**)  
132 out to day 21 p.i.

133 We next determined the protective efficacy of MBP134<sup>AF</sup> against lethal BDBV/But-  
134 811250 challenge in the cynomolgus macaque model of infection<sup>5,9</sup>. We chose to treat  
135 animals at day 7 p.i. with MBP134<sup>AF</sup> because previous reports indicated that they were  
136 already viremic and showing signs of EVD at this time point<sup>9</sup>. We reasoned that treatment  
137 under these post-exposure conditions would afford a rigorous evaluation of MBP134<sup>AF</sup>'s  
138 ability to reverse advanced EVD caused by BDBV.

139 Accordingly, a cohort of 9 animals was exposed to 1,000 PFU (i.m.) of BDBV/But-  
140 811250. Six randomly selected animals received a single 25-mg/kg i.v. infusion of  
141 MBP134<sup>AF</sup> on day 7 p.i. and three received PBS. This single dose of MBP134<sup>AF</sup> provided  
142 significant levels of protection (P value of 0.006 or 0.0108 if calculated including the  
143 historical controls<sup>9</sup>), with only one animal succumbing to infection. By contrast, uniform  
144 lethality was observed in the PBS control group (**Fig. 4a**). Prior to MBP134<sup>AF</sup> treatment  
145 on day 7 p.i., animals registered elevated clinical scores and body temperatures, viremia

146 as high as  $\sim 10^{11}$  GEQ/mL or  $10^7$  PFU/mL, and EVD-induced thrombocytopenia (**Fig. 4b-**  
147 **f**). By the next blood collection point, on day 10 p.i., animals that received MBP134<sup>AF</sup> had  
148 no detectable infectious BDBV in the blood, and clinical scores were reduced to basal  
149 levels by day 12 p.i., a complete reversion of infection and disease. The single treated  
150 animal that succumbed, NHP-5, did not have the highest viral load but showed acute liver  
151 injury prior to treatment, displaying the highest ALP, ALT, and AST levels of all the  
152 animals in the cohort on day 7 p.i. prior to receiving its dose of MBP134<sup>AF</sup> (**Fig. 4g-i,**  
153 **Extended Data Fig. 5**). Given the recovery of two animals (NHP-4 and NHP-6) harboring  
154 higher viral loads prior to treatment, we postulate that NHP-5's liver injury prior to  
155 treatment was too severe for it to recover despite receiving MBP134<sup>AF</sup>. To our knowledge,  
156 MBP134<sup>AF</sup> is the first therapeutic to demonstrate significant levels of protection and  
157 reversion of BDBV disease in cynomolgus macaques.

158         Prior to this work, the development of monoclonal antibody-based therapeutics has  
159 typically followed a “one bug, one drug” paradigm under the premise that mAbs with broad  
160 activity would not be as potent as those with clade-specific activity<sup>18</sup>. Here, we  
161 demonstrate that MBP134<sup>AF</sup>, a pan-ebolavirus immunotherapeutic comprising two bNAb  
162 ADI-15878<sup>AF</sup> and ADI-23774<sup>AF</sup> could not only protect NHPs against every ebolavirus  
163 known to cause human disease outbreaks but could do so at an unparalleled single 25-  
164 mg/kg dose. Importantly, MBP134<sup>AF</sup> was effective against multiple ebolaviruses from  
165 different species, suggesting that it will retain activity in the face of both intra- and inter-  
166 species sequence divergence, a result of its targeting highly conserved epitopes in GP.  
167 Indeed, as shown in the companion paper (*Wec et al.*), MBP134<sup>AF</sup> recognizes and  
168 neutralizes entry by the newly identified Bombali virus glycoprotein. Further studies

169 exploring 7.5 mg/kg or lower intravenous doses of MBP134<sup>AF</sup> could open the door to  
170 intramuscular or subcutaneous delivery via autoinjector, allowing for rapid and efficient  
171 drug administration to patients and reducing the burden on healthcare workers in the field  
172 and Ebola virus treatment units. The developmental path of MBP134<sup>AF</sup> presents a model  
173 for the rapid design of next-generation antiviral immunotherapeutics targeting World  
174 Health Organization-priority pathogens.

175



## References

- 177 1 Pascal, K. E. *et al.* Development of clinical-stage human monoclonal antibodies that treat  
178 advanced Ebola virus disease in non-human primates. *J Infect Dis*,  
179 doi:10.1093/infdis/jiy285 (2018).
- 180 2 Corti, D. *et al.* Protective monotherapy against lethal Ebola virus infection by a potently  
181 neutralizing antibody. *Science*, doi:10.1126/science.aad5224 (2016).
- 182 3 Henao-Restrepo, A. M. *et al.* Efficacy and effectiveness of an rVSV-vectored vaccine in  
183 preventing Ebola virus disease: final results from the Guinea ring vaccination, open-label,  
184 cluster-randomised trial (Ebola Ca Suffit!). *Lancet* **389**, 505-518, doi:10.1016/S0140-  
185 6736(16)32621-6 (2017).
- 186 4 Qiu, X. *et al.* Reversion of advanced Ebola virus disease in nonhuman primates with  
187 ZMapp. *Nature* **514**, 47-53, doi:10.1038/nature13777 (2014).
- 188 5 Burk, R. *et al.* Neglected filoviruses. *FEMS Microbiol Rev*, doi:10.1093/femsre/fuw010  
189 (2016).
- 190 6 Wec, A. Z. *et al.* Antibodies from a Human Survivor Define Sites of Vulnerability for  
191 Broad Protection against Ebolaviruses. *Cell* **169**, 878-890 e815,  
192 doi:10.1016/j.cell.2017.04.037 (2017).
- 193 7 Bornholdt, Z. A. *et al.* Isolation of potent neutralizing antibodies from a survivor of the  
194 2014 Ebola virus outbreak. *Science* **351**, 1078-1083, doi:10.1126/science.aad5788 (2016).
- 195 8 Thi, E. P. *et al.* Rescue of non-human primates from advanced Sudan ebolavirus infection  
196 with lipid encapsulated siRNA. *Nat Microbiol* **1**, 16142, doi:10.1038/nmicrobiol.2016.142  
197 (2016).
- 198 9 Mire, C. E. *et al.* Vesicular stomatitis virus-based vaccines protect nonhuman primates  
199 against Bundibugyo ebolavirus. *PLoS Negl Trop Dis* **7**, e2600,  
200 doi:10.1371/journal.pntd.0002600 (2013).
- 201 10 Goldstein, T. *et al.* Discovery of a new ebolavirus (Bombali virus) in molossid bats in  
202 Sierra Leone. *Nature Microbiology*, (in press) (2018).
- 203 11 Kozak, R. *et al.* Ferrets Infected with Bundibugyo Virus or Ebola Virus Recapitulate  
204 Important Aspects of Human Filovirus Disease. *J Virol* **90**, 9209-9223,  
205 doi:10.1128/JVI.01033-16 (2016).
- 206 12 Cross, R. W. *et al.* The Domestic Ferret (*Mustela putorius furo*) as a Lethal Infection Model  
207 for 3 Species of Ebolavirus. *J Infect Dis* **214**, 565-569, doi:10.1093/infdis/jiw209 (2016).
- 208 13 Cross, R. W. *et al.* Comparative Transcripomics in Ebola Makona-Infected Ferrets,  
209 Nonhuman Primates, and Humans. *J. Inf. Dis.*, (In Press) (2018).
- 210 14 Marillonnet, S., Thoeringer, C., Kandzia, R., Klimyuk, V. & Gleba, Y. Systemic  
211 *Agrobacterium tumefaciens*-mediated transfection of viral replicons for efficient transient  
212 expression in plants. *Nat Biotechnol* **23**, 718-723, doi:10.1038/nbt1094 (2005).
- 213 15 Zeitlin, L. *et al.* Enhanced potency of a fucose-free monoclonal antibody being developed  
214 as an Ebola virus immunoprotectant. *Proc Natl Acad Sci U S A* **108**, 20690-20694,  
215 doi:10.1073/pnas.1108360108 (2011).
- 216 16 Qiu, X. *et al.* Two-mAb cocktail protects macaques against the Makona variant of Ebola  
217 virus. *Sci Transl Med* **8**, 329ra333, doi:10.1126/scitranslmed.aad9875 (2016).

- 218 17 Ellis, D. S., Bowen, E. T., Simpson, D. I. & Stamford, S. Ebola virus: a comparison, at  
219 ultrastructural level, of the behaviour of the Sudan and Zaire strains in monkeys. *Br J Exp*  
220 *Pathol* **59**, 584-593 (1978).
- 221 18 Vigant, F., Santos, N. C. & Lee, B. Broad-spectrum antivirals against viral fusion. *Nat Rev*  
222 *Microbiol* **13**, 426-437, doi:10.1038/nrmicro3475 (2015).
- 223 19 Olinger, G. G., Jr. *et al.* Delayed treatment of Ebola virus infection with plant-derived  
224 monoclonal antibodies provides protection in rhesus macaques. *Proc Natl Acad Sci U S A*  
225 **109**, 18030-18035, doi:10.1073/pnas.1213709109 (2012).  
226

## 227 **Acknowledgements**

228 This project has been funded in part with federal funds from the Department of Defense  
229 under Contract No. HDTRA1-13-C-0018; the Department of Health and Human Services'  
230 National Institutes of Health (U19AI109711, U19AI109762, AI1332204 and AI132256),  
231 the Public Health Agency of Canada (PHAC), and Office of the Assistant Secretary for  
232 Preparedness and Response, and Biomedical Advanced Research and Development  
233 Authority (BARDA), under Contract No. HHSO100201700023C. K.C. was additionally  
234 supported by an Irma T. Hirsch/Monique Weill-Caulier Research Award. Opinions,  
235 conclusions, interpretations, and recommendations are those of the authors and are not  
236 necessarily endorsed by the US. Army. The mention of trade names or commercial  
237 products does not constitute endorsement or recommendation for use by the Department  
238 of the Army or the Department of Defense.

239

## 240 **Author Information**

241 These authors contributed equally: Zachary A. Bornholdt, Andrew S. Herbert, Chad E.

242 Mire, Shihua He

### 243 **Affiliations**

244 *Mapp Biopharmaceutical, Inc. San Diego, CA, USA*

245 Zachary A. Bornholdt, Dafna M. Abelson, William S. Shestowsky, Ognian Bohorov,

246 Natasha Bohorova, Jesus Velasco, Eric Ailor, Do Kim, Michael H. Pauly, Kevin J.

247 Whaley & Larry Zeitlin

248

249 *United States Army Medical Research Institute of Infectious Diseases, Fort Detrick, MD,*

250 *USA*

251 Andrew S. Herbert, Rebekah M. James & John M. Dye

252

253 *Department of Microbiology and Immunology, Galveston National Laboratory, University*

254 *of Texas Medical Branch at Galveston, TX, USA*

255 Chad E. Mire, Robert W. Cross, Joan B. Geisbert, Krystle N. Agans, Viktoriya

256 Borisevich & Thomas W. Geisbert

257

258 *Special Pathogens Program, National Microbiology Laboratory, Public Health Agency of*

259 *Canada, Winnipeg, MB, Canada*

260 Shihua He, Md Niaz Rahim, Wenjun Zhu, Logan Banadyga, Kevin Tierney & Xiangguo

261 Qiu

262

263 *Department of Microbiology and Immunology, Albert Einstein College of Medicine,*  
264 *Bronx, NY, USA*

265 Anna Wec & Kartik Chandran

266

267 *The Ragon Institute of MGH, MIT, and Harvard, Cambridge, MA, USA*

268 Bronwyn M. Gunn & Galit Alter

269

270 *Department of Medical Microbiology, University of Manitoba, Winnipeg, MB, Canada*

271 Md Niaz Rahim & Xiangguo Qiu

272

273 *Adimab LLC, Lebanon, NH, USA*

274 Anna Wec<sup>†</sup>, Eileen Goodwin & Laura M. Walker

275

276 † Current address

277

## 278 **Contributions**

279 L.Z., K.C., Z.A.B., X.Q., T.W.G., and J.M.D. conceived the overall study. A.S.H., C.E.M,

280 S.H., R.W.C, J.B.G., V.B., R.M.J., M.N.R, W.Z, L.B, K.T, X.Q., T.W.G and J.M.D.

281 performed the *in vivo* studies and data analyses in Figs. 1-4 and Extended Data Figs. 1,

282 3-5. D.M.A and Z.A.B. prepared MBP134<sup>AF</sup> for the ferret and guinea pig studies. O.B.,

283 N.B., J.V., M.P., and K.J.W., all contributed to the development and expression of the

284 plant derived MBP134<sup>AF</sup>. W.S.S. and E.A. developed the CHOK1-AF clonal pools for

285 MBP134<sup>AF</sup>. D.K. manufactured and formulated the CHOK1-AF expressed MBP134<sup>AF</sup> for

286 the NHP studies. A.Z.W. carried out VSV-based neutralization experiments to verify  
287 activity CHOK1-AF mAb lots prior to the NHP studies. B.G. and G.A. carried out mAb  
288 effector function studies reflected in Extended Data Fig. 2. L.Z., K.C., A.Z.W., Z.A.B.,  
289 A.S.H., C.E.M., S.H., X.Q., T.W.G., and J.M.D. wrote the manuscript with contributions  
290 from all of the authors.

291

### 292 **Competing interests**

293 Z.A.B., D.M.A., D.K., W.S.S., E.A., O.B., N.B., J.V., and M.P. are employees and  
294 shareholders of Mapp Biopharmaceutical. K.J.W and L.Z. are employees, shareholders,  
295 and owners of Mapp Biopharmaceutical, Inc. A.W., E.G. and L.W. are employees and  
296 shareholders of Adimab, LLC.

297

### 298 **Corresponding authors**

299

300 Correspondence to Larry Zeitlin ([Larry.Zeitlin@mappbio.com](mailto:Larry.Zeitlin@mappbio.com)) or Xiangguo Qiu  
301 ([xiangguo.qiu@canada.ca](mailto:xiangguo.qiu@canada.ca)) or Thomas W. Geisbert ([twgeisbe@UTMB.edu](mailto:twgeisbe@UTMB.edu)) or John M.  
302 Dye ([john.m.dye1.civ@mail.mil](mailto:john.m.dye1.civ@mail.mil))

303

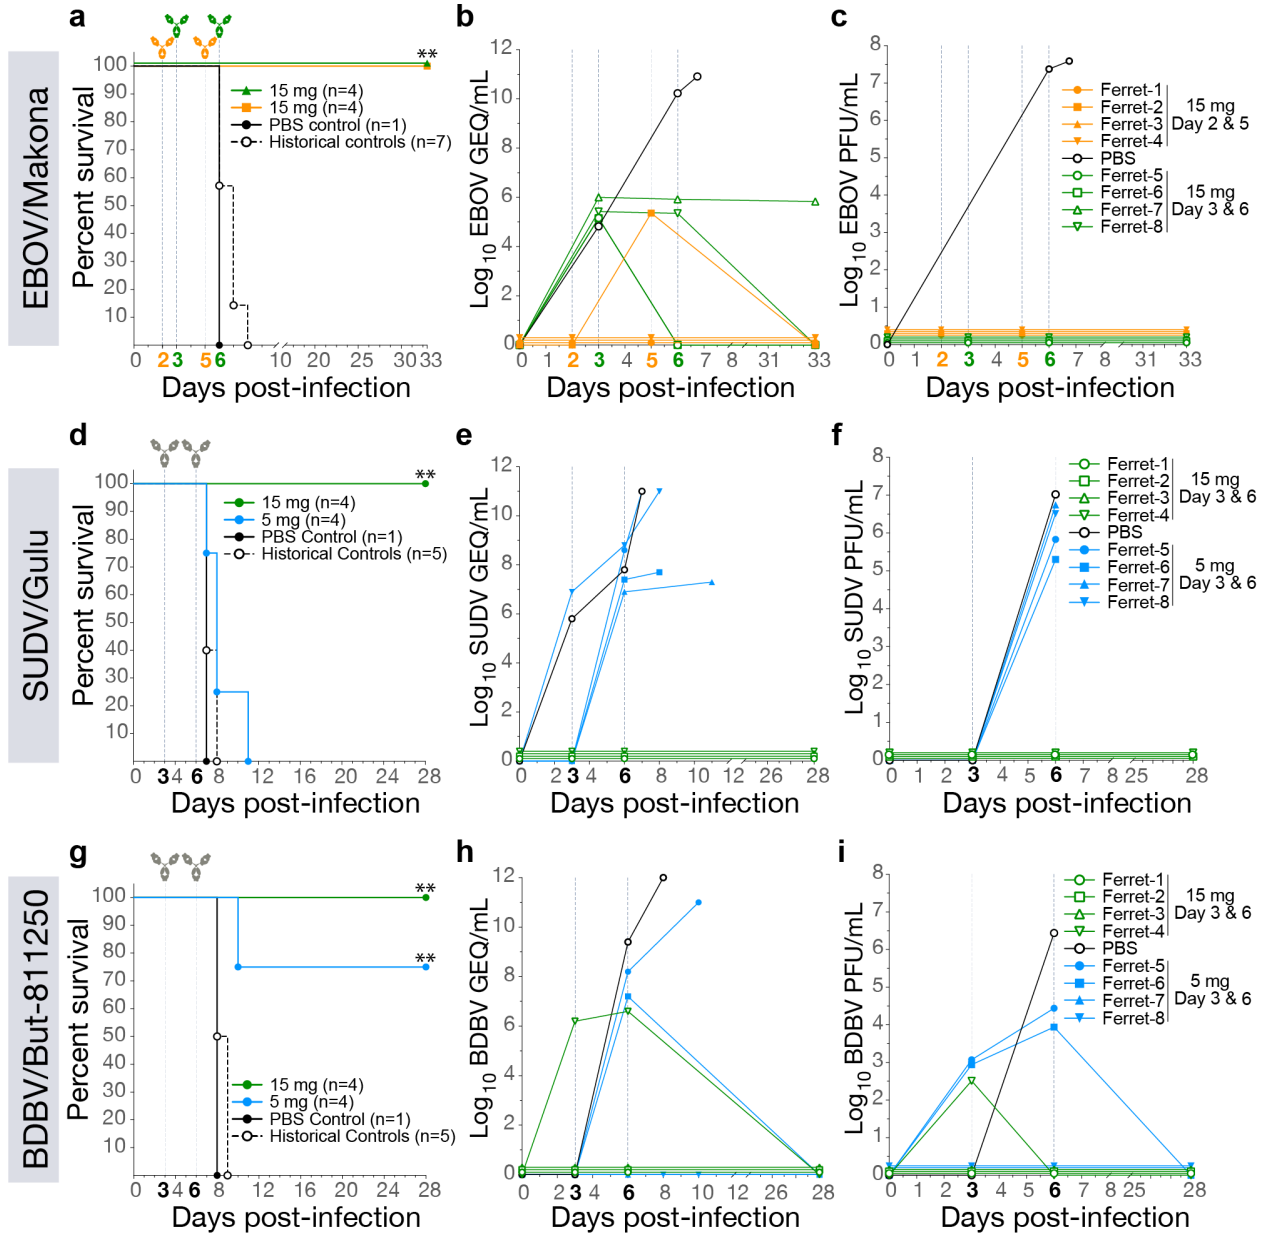

304

305 **Fig. 1: MBP134<sup>AF</sup> protects ferrets from lethal EBOV, SUDV and BDBV challenge.**

306 **a**, Survival curves for ferrets challenged with EBOV/Makona and treated with 15 mg of

307 MBP134<sup>AF</sup> on either Day 2 and 5 (orange) or Day 3 and 6 (green) post-infection. **b**,

308 Quantitative RT-PCR measuring average copies of EBOV/Makona genomic equivalents

309 per mL of whole blood (GEQ/mL) from animals treated on day 2 and 5 (orange) and day

310 3 and 6 (green) post-infection. **c**, EBOV/Makona present in animals treated on day 2 and

311 5 (orange) or day 3 and 6 (green). **d**, Survival curves for ferrets challenged with  
312 SUDV/Gulu and treated with 15-mg (green) or 5-mg (blue) doses of MBP134<sup>AF</sup> on day 3  
313 and 6 post infection. **e**, The average SUDV/Gulu GEQ/mL from animals treated with 15-  
314 mg (green) or 5-mg doses (blue). **f**, SUDV/Gulu viremia present in animals treated with  
315 15-mg (green) or 5-mg (blue) doses from panel D. **g**, Survival curves for ferrets  
316 challenged with BDBV/But-811250 and treated with 15-mg (green) or 5-mg (blue) doses  
317 of MBP134<sup>AF</sup> on day 3 and 6 post infection. **h**, Viremia present in animals treated with  
318 two 15-mg (green) or 5-mg doses (blue) from panel G. **i**, The average BDBV/But-811250  
319 GEQ/mL from animals treated with two 15-mg (green) or 5-mg doses (blue).  
320

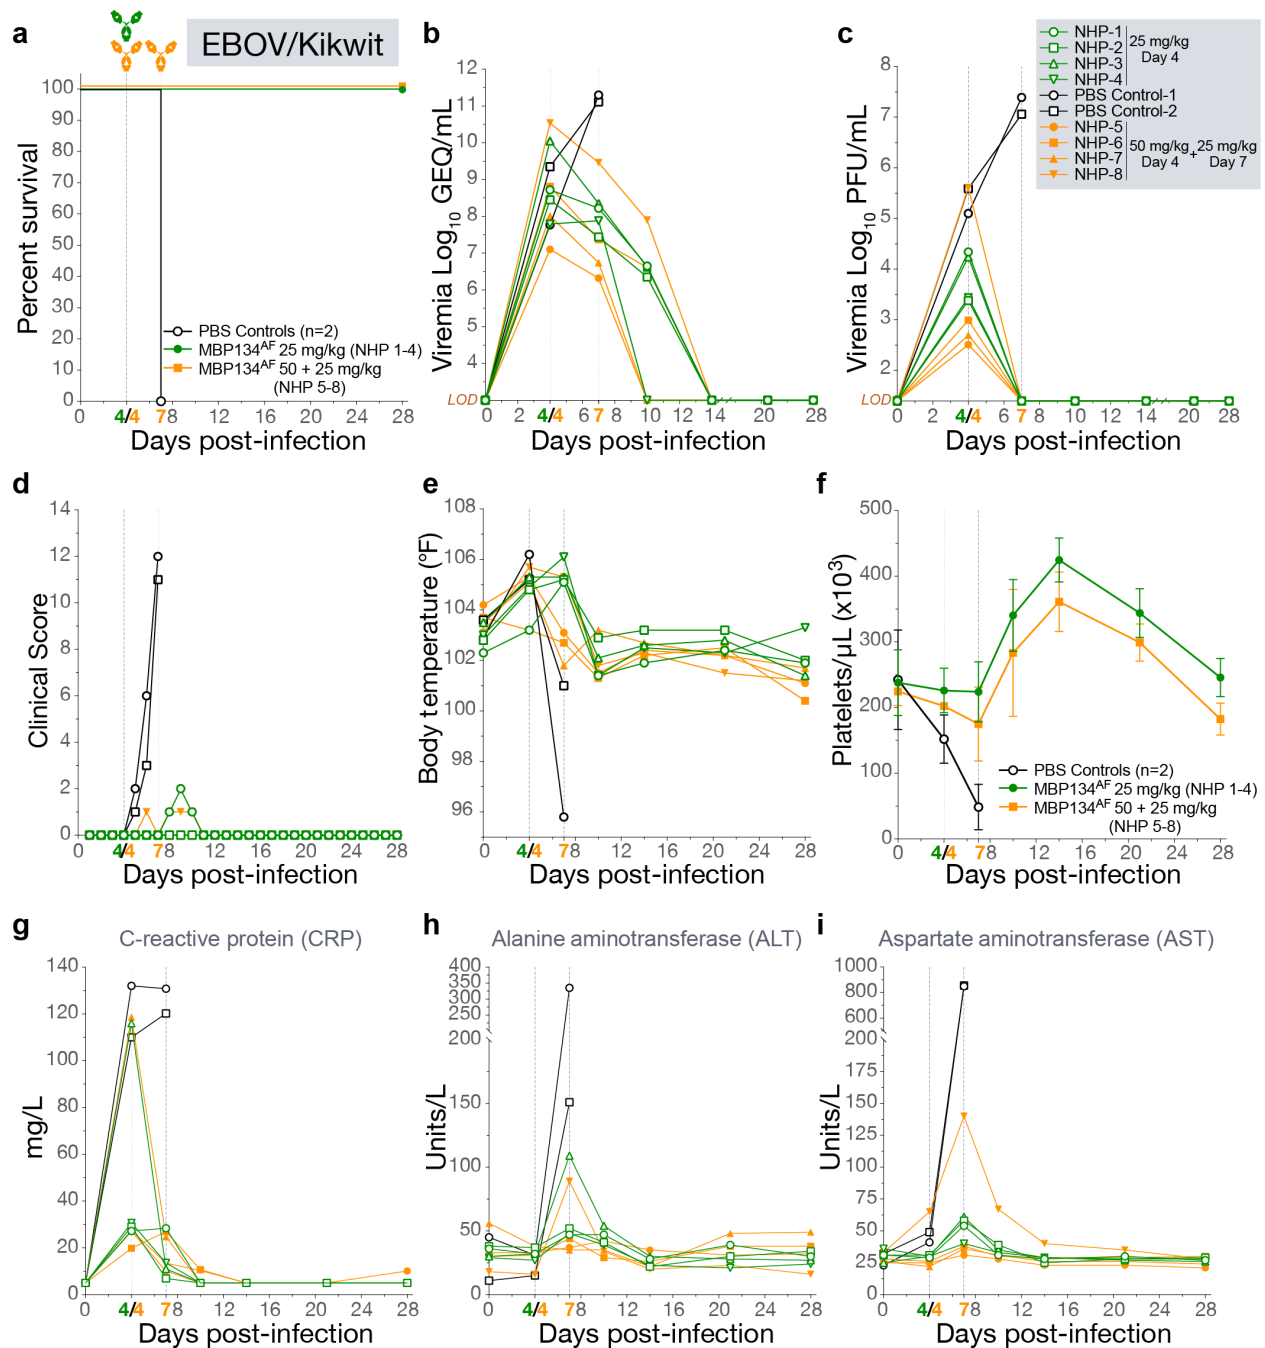

321  
322 **Fig. 2: A single 25 mg/kg dose of MBP134<sup>AF</sup> protects rhesus macaques challenged**

323 **with EBOV/Kikwit.**

324 **a**, Survival curves for NHPs challenged with EBOV/Kikwit and treated with a single 25-  
325 mg/kg dose of MBP134<sup>AF</sup> on day 4 (green) post-infection or a more conservative two-  
326 dose regimen of 50 mg/kg on day 4 and 25 mg/kg on day 7 (orange) post infection. **b**,



327 The average EBOV/Kikwit GEQ/mL from animals treated with a single dose of MBP134<sup>AF</sup>  
328 (green) or two doses of MBP134<sup>AF</sup> (orange). All detectable EBOV/Kikwit was eliminated  
329 10 days post treatment on day 4 post infection. **c**, Plaque-forming units (PFU) of infectious  
330 EBOV/Kikwit present in animals treated with either a single (green) or two-dose course  
331 of MBP134<sup>AF</sup> (orange). Infectious EBOV/Kikwit was no longer detectable by plaque assay  
332 by the next bleed of treated animals on day 7 post infection. **d**, Clinical scores of animals  
333 within the study cohort are shown. Aside from the control animals only NHP-1 and NHP-  
334 8 scored for partially or completely refusing their daily nutrition. **e**, Body temperatures  
335 taken during the course of the study show 9 of the ten animals registered an elevated  
336 temperature by day 7 p.i. Animals receiving MBP134<sup>AF</sup> returned to baseline temperature  
337 by day 10 p.i. **f**, The platelet counts for the cohort show severe thrombocytopenia in the  
338 control animals post-infection. By contrast, animals receiving MBP134<sup>AF</sup> rapidly  
339 recovered and displayed little or no signs of thrombocytopenia. **g**, The graphed C-reactive  
340 protein (CRP) levels show NHP-3 and NHP-8 suffered from acute inflammation as a result  
341 of EVD prior to MBP134<sup>AF</sup> treatment. **h**, The alanine aminotransferase (ALT) levels from  
342 each animal are shown, NHP-3 and NHP-8 again demonstrate signs of advanced EVD  
343 that were alleviated post-treatment. **i**, Aspartate aminotransferase (AST) levels for all the  
344 challenged animals shows initial signs of liver damage resultant of EVD. Samples from  
345 NHP-8 in particular show a significant spike in AST levels that returned to baseline post-  
346 treatment. Legend for graphs in top right-hand corner, *LOD* = limit of detection.

347

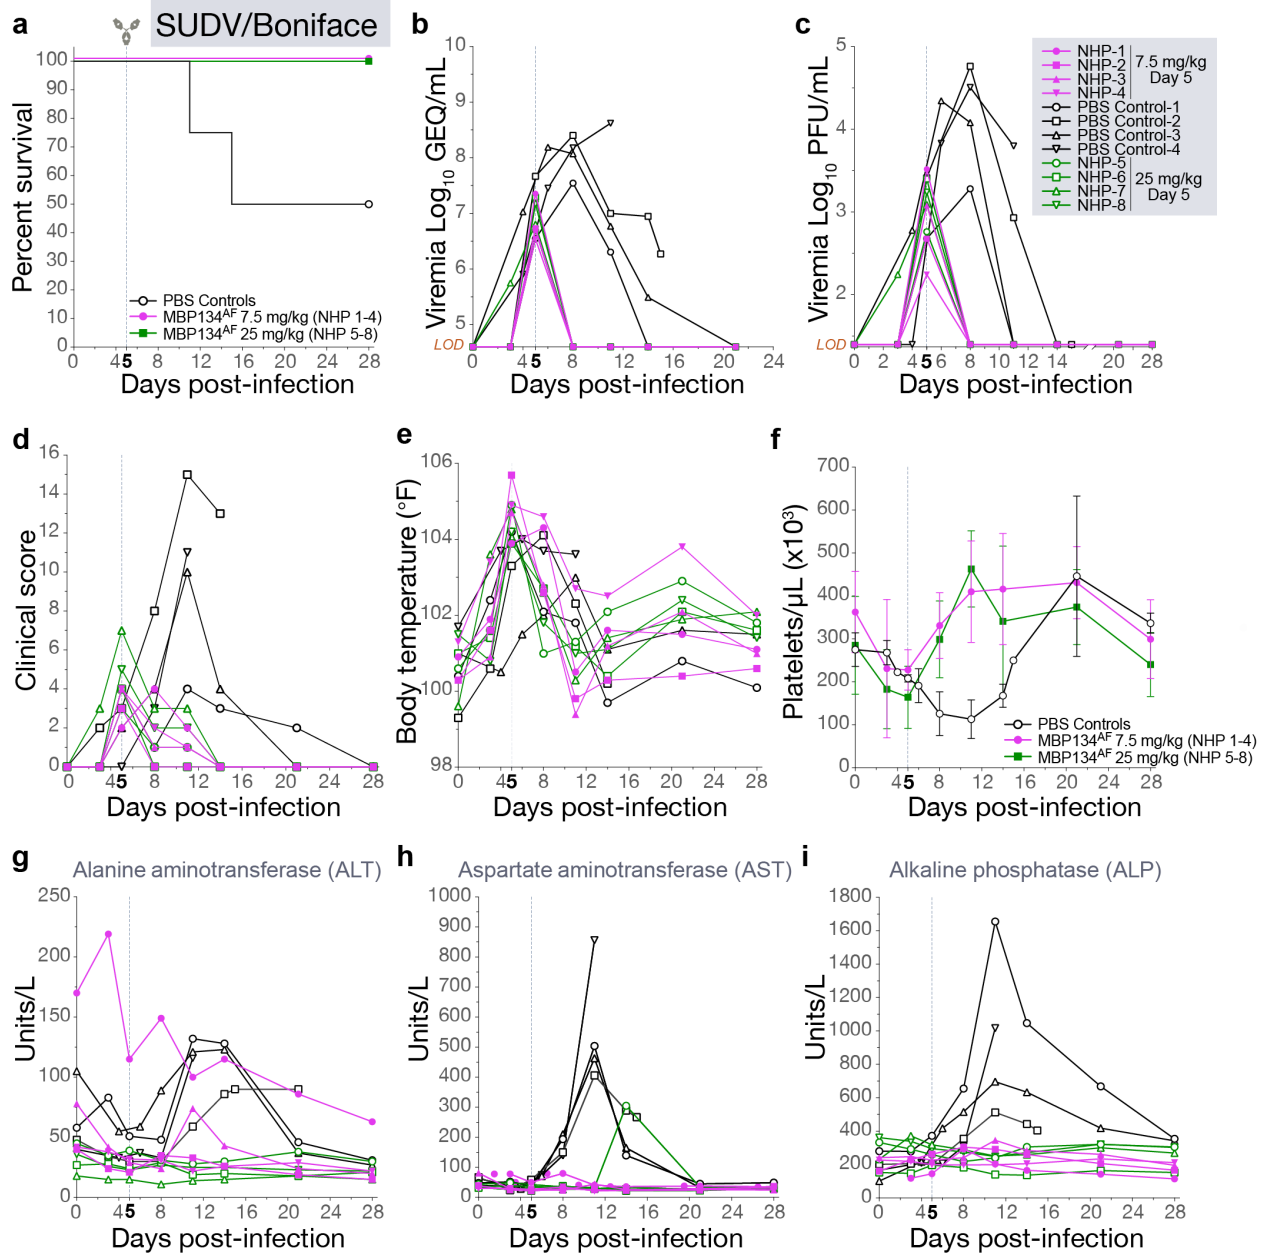

348  
 349 **Fig. 3: A single 25 mg/kg or 7.5 mg/kg dose of MBP134<sup>AF</sup> protects rhesus macaques**  
 350 **challenged with SUDV/Boniface.**

351 **a**, Survival curves for NHPs challenged with SUDV/Boniface receiving either PBS (black),  
 352 a 25-mg/kg dose of MBP134<sup>AF</sup> (green) or a 7.5-mg/kg (purple) dose of MBP134<sup>AF</sup> on day  
 353 5 post infection. **b**, The average SUDV/Boniface GEQ/mL from animals receiving a 25-  
 354 mg/kg dose of MBP134<sup>AF</sup> (green) or a 7.5-mg/kg dose of MBP134<sup>AF</sup> (purple). All

355 detectable SUDV/Boniface was eliminated by day 8 post infection (the next bleed post  
356 treatment). **c**, Plaque-forming units (PFU) of infectious SUDV/Boniface present in animals  
357 receiving a 25-mg/kg dose of MBP134<sup>AF</sup> (green) or a 7.5-mg/kg dose of MBP134<sup>AF</sup>  
358 (purple) as well as in PBS controls (black). Infectious SUDV/Boniface was no longer  
359 detectable by plaque assay by the next bleed on day 8 p.i. **d**, All of the animals in the  
360 cohort had clinical scores on day 5 p.i. prior to receiving MBP134<sup>AF</sup>. Animals dosed with  
361 MBP134<sup>AF</sup> no longer registered a clinical score by day 14 p.i., while the surviving controls  
362 continued scoring out to day 21 p.i. **e**, Body temperatures taken from the blinded cohort  
363 showed all the animals registered an elevated temperature by day 5 p.i., prior to receiving  
364 MBP134<sup>AF</sup>. **f**, The platelet counts for the cohort show declining counts p.i. with the  
365 MBP134<sup>AF</sup> treated animals rapidly recovering and the PBS controls displaying severe  
366 thrombocytopenia. **g**, The alanine aminotransferase (ALT) levels from each animal are  
367 shown; the control animals all display elevated levels from baseline post infection. In  
368 contrast, all of the animals receiving MBP134<sup>AF</sup> show little to no signs of EVD. Graph  
369 legend in panel F. **h**, The aspartate aminotransferase (AST) levels for all the MBP134<sup>AF</sup>  
370 treated animals show little to no increase in AST levels, while the control animals all show  
371 highly elevated AST levels by day 10 post-infection. **i**, The alkaline phosphatase (ALP)  
372 levels are graphed for each animal in the cohort, no sign of EVD induced ALP levels are  
373 present in any of the MBP134<sup>AF</sup> treated animals. In contrast, all of the control animals that  
374 received PBS display elevated ALP levels resulting from EVD. Legend for graphs in top  
375 right-hand corner, *LOD* = limit of detection.

376

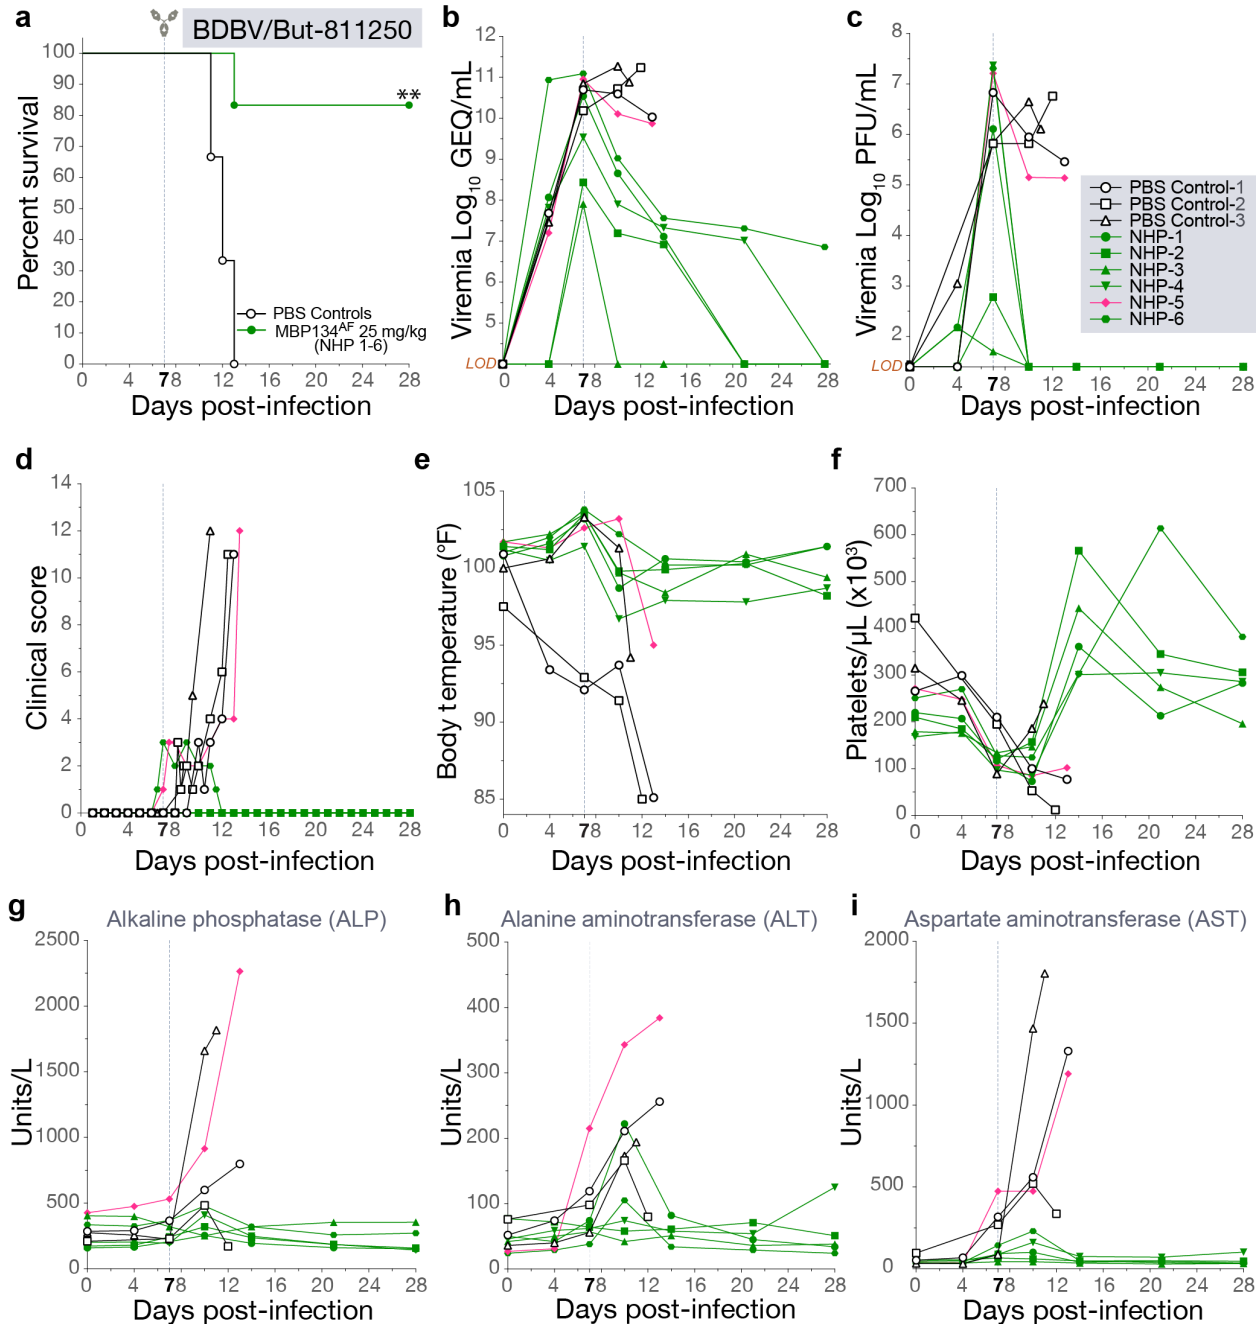

377  
 378 **Fig. 4: A single 25 mg/kg dose of MBP134<sup>AF</sup> protects cynomolgus macaques**  
 379 **challenged with BDBV/But-811250.**

380 **a**, Survival curves for NHPs challenged with BDBV/But-811250 and treated with a single  
 381 25-mg/kg dose of MBP134<sup>AF</sup> on day 7 post infection (green) or PBS (black). **b**, The  
 382 average BDBV/But-811250 GEQ/mL from animals treated with a single dose of

383 MBP134<sup>AF</sup> (green) or PBS (black). Serum samples taken from NHP-4 and NHP-6 on days  
384 20 and 28 tested negative for viral genetic material. **c**, Plaque-forming units (PFU) of  
385 infectious BDBV/But-811250 present in animals treated with MBP134<sup>AF</sup> (green) or PBS  
386 (black). Infectious BDBV was no longer detectable by plaque assay by the next bleed on  
387 day 10 post infection in the surviving animals. **d**, Clinical scores show NHP-5 and NHP-6  
388 registering scores from refusing nutrition, having a hunched posture and displaying  
389 petechiation over 10% of their bodies prior to receiving MBP134<sup>AF</sup> on day 7 p.i. While  
390 NHP-6 cleared clinical signs of infection by day 12 p.i., NHP-5 failed to recover and  
391 succumbed to infection on 13 p.i. **e**, Body temperatures from all the animals showed the  
392 majority registered an elevated temperature by day 7 p.i. prior to receiving MBP134<sup>AF</sup>. **f**,  
393 The platelet counts for the cohort show thrombocytopenia occurring in all the animals by  
394 day 7 p.i. prior to receiving MBP134<sup>AF</sup>. All the MBP134<sup>AF</sup> treated animals (excluding NHP-  
395 5) cleared signs of thrombocytopenia by day 14 p.i., seven days post treatment. **g**, The  
396 alkaline phosphatase (ALP) levels are graphed for each animal in the cohort. **h**, The  
397 alanine aminotransferase (ALT) levels from each animal are shown. Notably NHP-5  
398 displayed advanced signs of EVD prior to treatment. **i**, Aspartate aminotransferase (AST)  
399 levels for all the challenged animals shows initial signs of liver damage resultant of EVD.  
400 Samples from NHP-5 in particular show a significant spike in AST levels suggesting a  
401 severe onset of disease beyond that of the other animals in the cohort, a possible  
402 explanation of NHP-5's succumbing to EVD despite receiving the MBP134<sup>AF</sup> treatment  
403 course. Legend for graphs in top right-hand corner, *LOD* = limit of detection.

404
